# Supplementary material for: Findings of the Chronic Obstructive Pulmonary Disease-Sitting and Exacerbations Trial (COPD-SEAT) in Reducing Sedentary Time Using Wearable and Mobile Technologies With Educational Support: Randomized Controlled Feasibility Trial
Source: PubMed Central journal article supplement (PMC5917078; doi:10.2196/mhealth.9398), 2018-04-11
Supplement: mhealth_v6i4e84_app2.pdf [file mhealth_v6i4e84_app2.pdf]

---

**Supplementary File 1** Accelerometry data collection and analytical procedures

---

| <b>Information</b>       | <b>Details</b>                                                                                                                                                                           |
|--------------------------|------------------------------------------------------------------------------------------------------------------------------------------------------------------------------------------|
| Accelerometer Model      | ActiGraph wGT3X-BT (version 6.13.2; firmware 1.6.1)                                                                                                                                      |
| Serial number range      | Sixteen unique devices were used ranging from MOS2A02140493 to MOS2A02140631; averaging two deployments per device                                                                       |
| Piezosensor orientation  | Triaxial                                                                                                                                                                                 |
| Mode setup               | Mode 29 (x, y, z, steps, lux)                                                                                                                                                            |
| Original sample rate     | 100 Hz (.gt3x file format)                                                                                                                                                               |
| Deployment method        | Fitted by patient (on day 1) and after demonstration and practice (on day 0)                                                                                                             |
| Location worn            | Anterior hip adjacent to the mid-line of the thigh                                                                                                                                       |
| Requested days of wear   | 14 d (20160 epochs) not including day 0                                                                                                                                                  |
| Initialization           | Deployed in delay mode on day 0 (during admission) and commenced logging on day 1 (first full day after discharge) at 00:00 with no stop time (estimated date of discharge not reliable) |
| Wear instructions        | Wear continuously except for sleep and water based activities                                                                                                                            |
| Non-wear appropriation   | ≥60 min of consecutive 0s with allowance for 2 minutes of interruptions were deemed biologically implausible and coded as non-wear                                                       |
| Valid day criteria       | ≥8 hours of valid waking wear time                                                                                                                                                       |
| Valid file               | ≥4 valid days out of 7 days for each of the two weeks                                                                                                                                    |
| Missing data             | Data modelling or imputation was not performed                                                                                                                                           |
| Epoch length             | 60 seconds                                                                                                                                                                               |
| Intensity classification | Uniaxial (x-axis) cut-points as follows: Sedentary time <100 cpm; Light 100-2019 cpm; MVPA ≥2020 cpm                                                                                     |

---
